# Supplementary material for: Electrochemical determination of trace pesticide residues based on multiwalled carbon nanotube grafted acryloyloxy ferrocene carboxylates with different spacers
Source: Royal Society of Chemistry journal article supplement (doi:10.1039/c6ra26436k), 2017-01-01
Supplement: c6ra26436k1.pdf [file c6ra26436k1.pdf]

## Supporting Information

# **Electrochemical determination of trace pesticide residues based on multiwalled carbon nanotube grafted acryloyloxy ferrocene carboxylates with different spacers**

Feng Xu\*, Zhuo-Miao Cui, He Li, Yan-Ling Luo\*

(Key Laboratory of Macromolecular Science of Shaanxi Province, School of Chemistry  
and Chemical Engineering, Shaanxi Normal University, Xi'an 710062, P. R. China)

Contact details for corresponding authors

**Feng Xu and Yan-Ling Luo**

Fax: +86 29 81530727

E-mail address: fengxu@snnu.edu.cn (F. Xu) and luoyanl@snnu.edu.cn (Y. L. Luo)

Affiliations: Key Laboratory of Macromolecular Science of Shaanxi Province, School  
of Chemistry & Chemical Engineering, Shaanxi Normal University, Xi'an 710062,  
People's Republic of China

Fax: +86 29 81530727

## 1. Preparation and $^1\text{H}$ NMR of monomers

2-Acryloyloxyethyl ferrocene carboxylate (AEFC) was prepared via esterification reaction of FCA with HEA using DMAP as a catalyst and DCC as a dehydration agent, with the molar ratio of 1:1.2:1.2:1. In a sealed 500 ml three-neck flask, FCA (9.2 g, 40 mmol) was dissolved in a mixture of dried  $\text{CH}_2\text{Cl}_2$  (50 ml), HEA (6.64 ml, 48 mmol) and DMAP (5 g, 40 mmol). Under the condition of  $\text{N}_2$  atmosphere, DCC (10 g, 48 mmol) dissolved in desiccative  $\text{CH}_2\text{Cl}_2$  of 30 ml was dropwise added to the mixed solution at  $0\text{ }^\circ\text{C}$  at a speed of 3-4 drop  $\text{s}^{-1}$  and the reaction mixture was stirred at  $0\text{ }^\circ\text{C}$  for 2 h. The reaction proceeded at room temperature overnight. The resulting solution was filtered to remove the sediment 1,3-dicyclohexylurea (DCU). The filtrate was extracted twice by using saturated sodium bicarbonate solution and deionized water, respectively, to remove DMAP and unreacted FCA until the supernatant is colorless. After the concentration, the extract was purified by column chromatography using a mixture of *n*-hexane and ethyl acetate ( $v/v=10/1$ ) as an eluent to give an orange solid product with a yield of 76%.  $^1\text{H}$  NMR (400 MHz,  $\text{CDCl}_3$ ),  $\delta$  (ppm): 6.38-6.44 (dd, 1H), 6.07-6.16 (dd, 1H), 5.79-5.83 (dd, 1H), 4.75 (s, 2H, *meta*-H in  $-\text{C}_5\text{H}_4$ ), 4.41 (t, 4H,  $-\text{OCH}_2-\text{CH}_2\text{O}-$ ), 4.34 (s, 2H, *ortho*-H in  $-\text{C}_5\text{H}_4$ ), 4.13 (s, 5H,  $\text{C}_5\text{H}_5$ ).

4-Acryloyloxybutyl ferrocene carboxylate (ABFC) was prepared through a similar

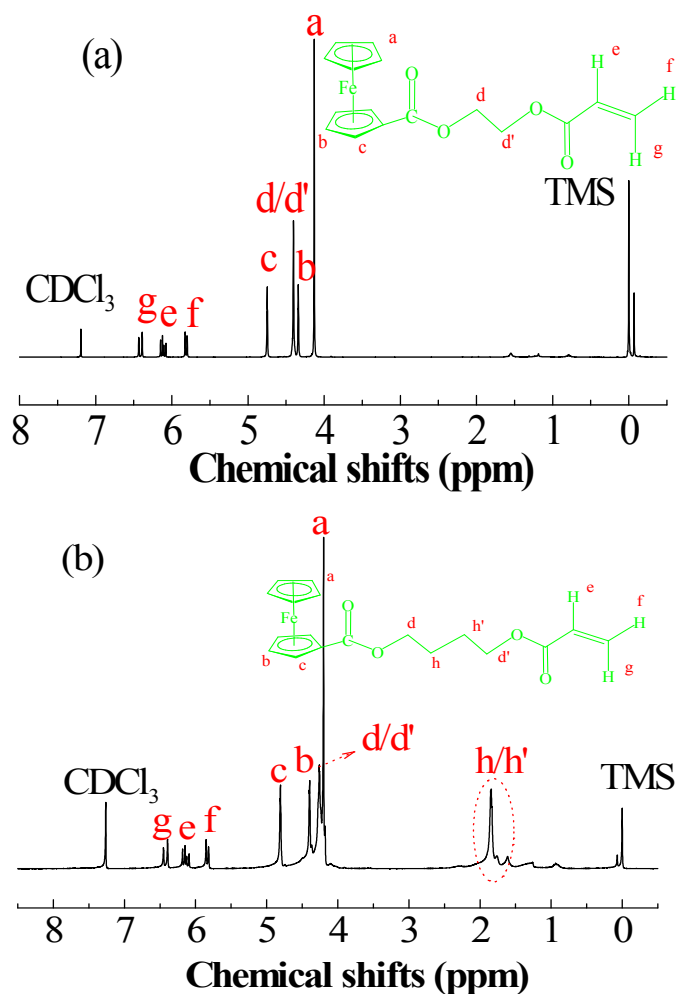

Figure S1  $^1\text{H}$  NMR spectra of AEFC and ABFC.

reaction to AEFC. 9.20 g (40 mmol) FCA, 6.65 ml (48 mmol) HBC, 4.88 g (40 mmol) DMAP, and 9.89 g (48 mmol) DCC were used for the reaction, and the crude product was purified by column chromatography using a mixture of *n*-hexane and ethyl acetate ( $v/v=15/1$ ), giving dark orange oily liquid with a yield of 68%.  $^1\text{H}$  NMR (400 MHz,  $\text{CDCl}_3$ ),  $\delta$  (ppm): 6.40-6.46 (dd, 1H), 6.10-6.19 (dd, 1H), 5.82-5.87 (dd, 1H), 4.71 (s, 2H, *meta*-H in  $-\text{C}_5\text{H}_4$ ), 4.40 (s, 2H, *ortho*-H in  $-\text{C}_5\text{H}_4$ ), 4.26 (t, 4H,  $-\text{OCH}_2\text{-CH}_2\text{-CH}_2\text{-CH}_2\text{O-}$ ), 4.20 (s, 5H,  $\text{C}_5\text{H}_5$ ). 1.62-1.85 (m, 4H,  $-\text{OCH}_2\text{-CH}_2\text{-CH}_2\text{-CH}_2\text{O-}$ ).

## 2. Pre-treatment of glass carbon electrodes (GCEs)

For pre-treatment of GCEs, the bare GCEs were polished using 0.05 and 0.3  $\mu\text{m}$  alumina slurry in sequence and rinsed with deionized water, sonicated with ethanol and deionized water for 5 minutes each procedure.

## 3. High-resolution XPS spectra of MWCNTs-COOH and the related composites

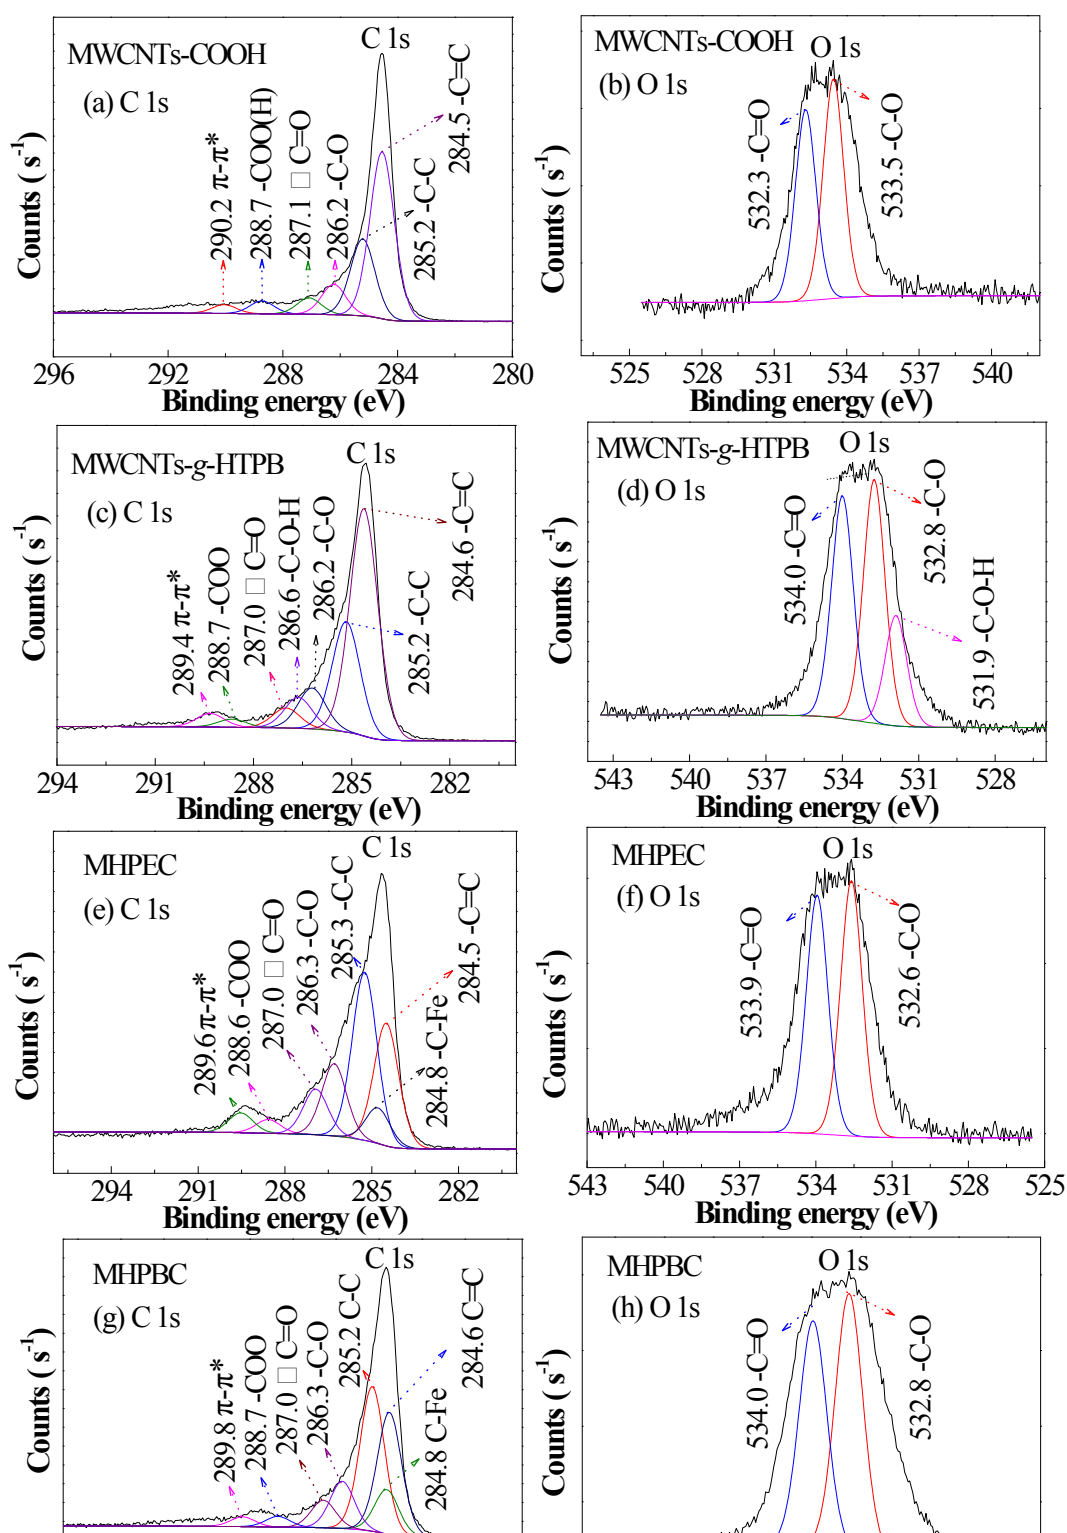

Table S1 Mass ratios in different materials

| Samples               | C, %  | O, % | Fe, % |
|-----------------------|-------|------|-------|
| MWCNTS                | 95.98 | 4.02 | 0     |
| MWCNTs-g-HTPB         | 93.15 | 6.85 | 0     |
| MWCNTs-g-HTPB-b-PAEFC | 89.63 | 9.42 | 0.95  |
| MWCNTs-g-HTPB-b-PABFC | 91.75 | 7.49 | 0.76  |

#### 4. CVs of MHPEC modified electrodes

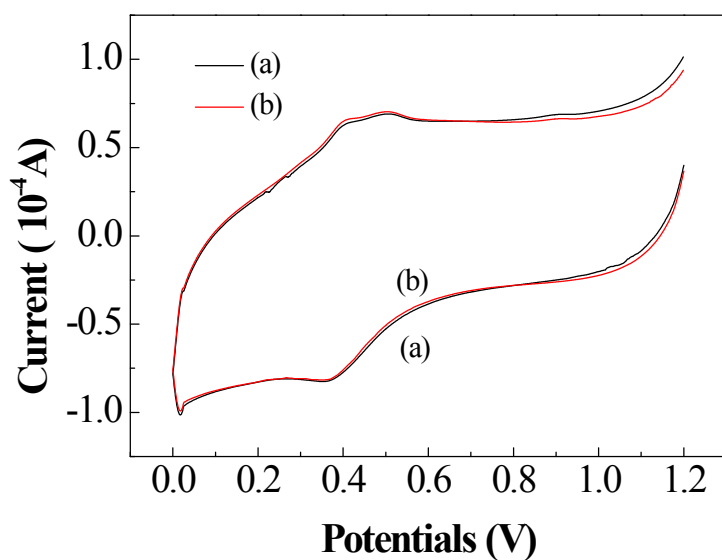

Figure S3 CVs of the MHPEC modified electrodes: (a) in the absence of and (b) in presence of  $1 \times 10^{-3}$  melamine in 1 M  $\text{H}_2\text{SO}_4$  solution at a scan rate of  $50 \text{ mV s}^{-1}$ .

#### 5. Detection of the residues of melamine in real milk

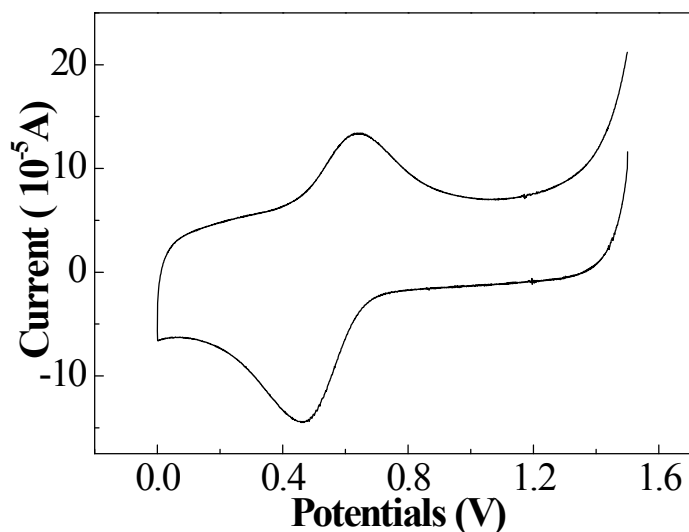

Figure S4 CVs of the MHPEC modified electrodes for detection of the residues of melamine in real milk.

#### 6. Stability of MHPBC modified electrodes by CV

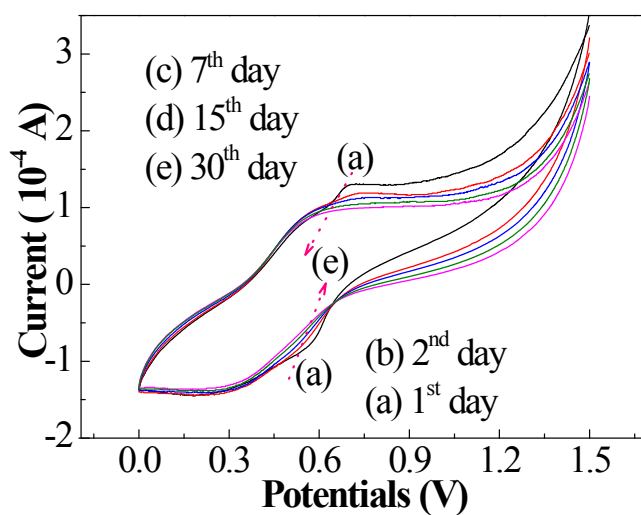

Figure S5 CVs of the MHPBC modified electrode sensors at various time intervals: (a) the 1<sup>st</sup> day, (b) the 2<sup>nd</sup> day, (c) the 7<sup>th</sup> day, (d) the 15<sup>th</sup> day, and (e) the 30<sup>th</sup> day, in PBS of pH 7.0 at a scan rate of 50 mV s<sup>-1</sup> (Melamine concentration:  $4.2 \times 10^{-6}$  mol l<sup>-1</sup>).

## 7. Stability and reproducibility of modified electrodes by DPV

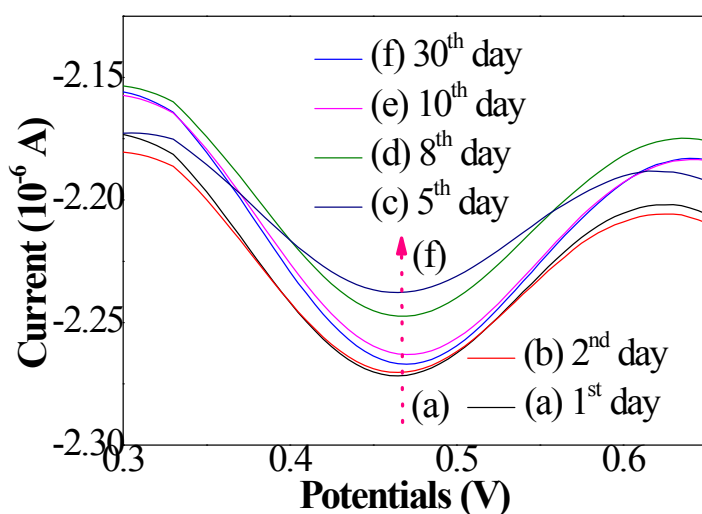

Figure S6 DPV profiles of the MHPBC sensors at various time intervals: (a) the 1<sup>st</sup> day, (b) the 2<sup>nd</sup> day, (c) the 5<sup>th</sup> day, (d) the 8<sup>th</sup> day, (e) the 10<sup>th</sup> day and (f) the 30<sup>th</sup> day, in PBS of pH 7.0 at a scan rate of  $50 \text{ mV s}^{-1}$  (Trichlorfon concentration:  $1 \times 10^{-8} \text{ mol l}^{-1}$ ).

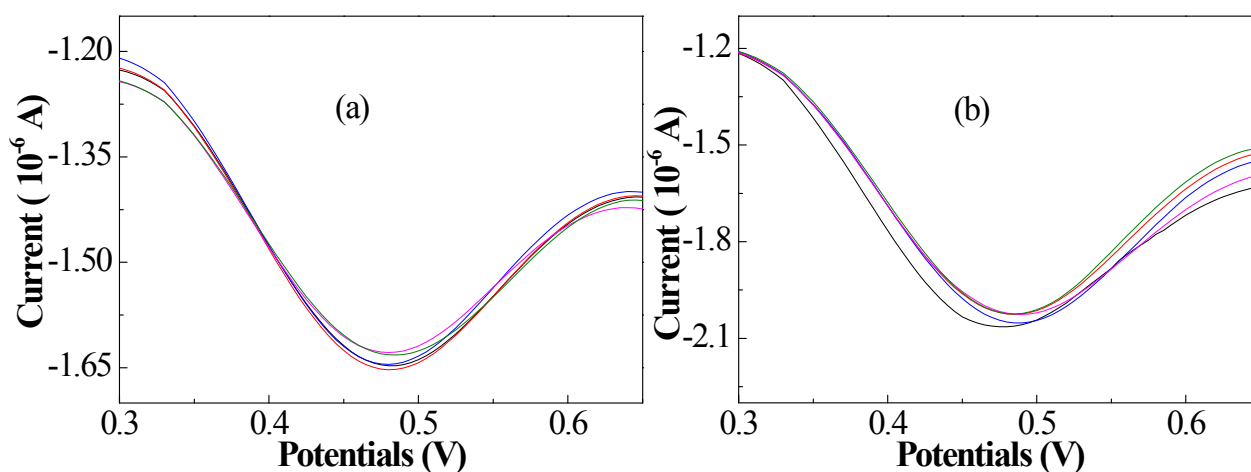

Figure S7 DPV profiles of (a) five measurements using the same MHPBC modified electrode in PBS of pH 7.0 (Trichlorfon concentration:  $1 \times 10^{-12} \text{ mol l}^{-1}$ ) and (b) five MHPBC modified electrodes fabricated individually in PBS of pH 7.0 (Trichlorfon concentration:  $1 \times 10^{-9} \text{ mol l}^{-1}$ ).

Table S2 Resistances (R) of the prepared nanohybrid composite samples with various spacers.

| Samples | R1 (k $\Omega$ ) | R2 (k $\Omega$ ) | R3 (k $\Omega$ ) | Mean R (k $\Omega$ ) |
|---------|------------------|------------------|------------------|----------------------|
| MHPEC   | 10.62            | 10.58            | 10.55            | 10.58                |
| MHPBC   | 2.56             | 2.53             | 2.52             | 2.54                 |
